# Supplementary material
Source: PubMed Central journal article supplement (PMC3443319)
Supplement: NIHMS393296-supplement-1.pdf [file NIHMS393296-supplement-1.pdf]

**Supplementary Table 1. Yeast strains**

| <b>Strain</b> | <b>Genotype*</b>                                                                    | <b>Source or reference</b> |
|---------------|-------------------------------------------------------------------------------------|----------------------------|
| LSY0697       | <i>MATa met17-s ADE2</i>                                                            | <sup>1</sup>               |
| LSY1026       | <i>MATa met17-s ADE2 mus81::KanMX6</i>                                              | <sup>2</sup>               |
| LSY1801-4C    | <i>MATa met17-s ADE2 mus81:: KanMX6 yen1::HIS3</i>                                  | This study                 |
| LSY2105-5A    | <i>MATa met17-s ADE2 rad1::LEU2 yen1::HIS3</i>                                      | This study                 |
| LSY2105-6D    | <i>MATa met17-s ADE2 rad1::LEU2 mus81::KanMX6</i>                                   | This study                 |
| LSY2105-29B   | <i>MATa met17-s ADE2 mus81:: KanMX6 rad1::LEU2 yen1::HIS3</i>                       | This study                 |
| LSY2108-3C    | <i>MATa met17-s ADE2 rad1::LEU2</i>                                                 | This study                 |
| LSY2109-104C  | <i>MATa yen1::HIS3 met17-s ADE2</i>                                                 | This study                 |
| LSY2202-10C   | <i>MATa ade2-n his3::NatMX4 met22::klURA3 rad1::LEU2</i>                            | <sup>2</sup>               |
| LSY2202-11A   | <i>MATa ade2-n his3::NatMX4 met22::klURA3 mus81::KanMX6 rad1::LEU2 yen1::HIS3</i>   | <sup>2</sup>               |
| LSY2202-15D   | <i>MATa ade2-n his3::NatMX4 met22::klURA3</i>                                       | <sup>2</sup>               |
| LSY2202-17B   | <i>MATa ade2-n his3::NatMX4 met22::klURA3 mus81::KanMX6 rad1::LEU2</i>              | <sup>2</sup>               |
| LSY2202-19D   | <i>MATa ade2-n his3::NatMX4 met22::klURA3 mus81::KanMX6 yen1::HIS3</i>              | <sup>2</sup>               |
| LSY2202-24C   | <i>MATa ade2-n his3::NatMX4 met22::KLURA3 rad1::LEU2 yen1::HIS3</i>                 | <sup>2</sup>               |
| LSY2202-26A   | <i>MATa ade2-n his3::NatMX4 met22::klURA3 mus81::KanMX6</i>                         | <sup>2</sup>               |
| LSY2202-42A   | <i>MATa ade2-n his3::NatMX4 met22::klURA3 yen1::HIS3</i>                            | <sup>2</sup>               |
| LSY2205-3A    | <i>MATa ade2-l lys2::GAL-ISCEI his3::HphMX4 rad1::LEU2 yen1::HIS3</i>               | <sup>2</sup>               |
| LSY2205-6A    | <i>MATa ade2-l lys2::GAL-ISCEI his3::HphMX4 mus81::KanMX6</i>                       | <sup>2</sup>               |
| LSY2205-7C    | <i>MATa ade2-l lys2::GAL-ISCEI his3::HphMX4 mus81:: KanMX6 rad1::LEU2</i>           | <sup>2</sup>               |
| LSY2205-11C   | <i>MATa ade2-l lys2::GAL-ISCEI his3::HphMX4</i>                                     | <sup>2</sup>               |
| LSY2205-11D   | <i>MATa ade2-l lys2::GAL-ISCEI his3::HphMX4 rad1::LEU2</i>                          | <sup>2</sup>               |
| LSY2205-24D   | <i>MATa ade2-l lys2::GAL-ISCEI his3::HphMX4 yen1::HIS3</i>                          | <sup>2</sup>               |
| LSY2205-67B   | <i>MATa ade2-l lys2::GAL-ISCEI his3::HphMX4 mus81::KanMX6 rad1::LEU2 yen1::HIS3</i> | <sup>2</sup>               |
| LSY2205-77B   | <i>MATa ade2-l lys2::GAL-ISCEI his3::HphMX4 mus81::KanMX6 yen1::HIS3</i>            | <sup>2</sup>               |
| LSY1929       | <i>MATa-inc ura3-HOcs lys2::ura3-HOcs inc (1.2kb) ade3::GAL-HO</i>                  | <sup>3</sup>               |
| LSY2540-8A    | <i>MATa-inc ura3-HOcs lys2::ura3-HOcs inc (1.2kb) ade3::GAL-HO rad1::LEU2</i>       | This study                 |
| LSY2540-12A   | <i>MATa-inc ura3-HOcs lys2::ura3-HOcs inc (1.2kb) ade3::GAL-HO mus81::KanMX6</i>    | This study                 |

|             |                                                                                                                              |              |
|-------------|------------------------------------------------------------------------------------------------------------------------------|--------------|
| LSY2540-16C | <i>MATa-inc ura3-HOcs lys2::ura3-HOcs inc</i><br>(1.2kb) <i>ade3::GAL-HO yen1::HIS3</i>                                      | This study   |
| LSY2540-18A | <i>MATa-inc ura3-HOcs lys2::ura3-HOcs inc</i><br>(1.2kb) <i>ade3::GAL-HO mus81::KanMX6</i><br><i>yen1::HIS3</i>              | This study   |
| LSY2540-19D | <i>MATa-inc ura3-HOcs lys2::ura3-HOcs inc</i><br>(1.2kb) <i>ade3::GAL-HO mus81::KanMX6</i><br><i>rad1::LEU2</i>              | This study   |
| LSY2566-3D  | <i>MATa-inc ura3-HOcs lys2::ura3-HOcs inc</i><br>(1.2kb) <i>ade3::GAL-HO rad1::LEU2</i><br><i>yen1::HIS3</i>                 | This study   |
| LSY2566-5A  | <i>MATa-inc ura3-HOcs lys2::ura3-HOcs inc</i><br>(1.2kb) <i>ade3::GAL-HO rad1::LEU2</i><br><i>yen1::HIS3 mus81::KanMX6</i>   | This study   |
| LSY2520     | <i>MATa-inc ura3::HOcs lys2::ura3-HOcs inc</i><br>(5.6 kb) <i>ade3::GAL-HO</i>                                               | <sup>4</sup> |
| LSY2521     | <i>MATa-inc ura3::HOcs lys2::ura3-HOcs inc</i><br>(5.6 kb) <i>ade3::GAL-HO yen1::KanMX6</i>                                  | <sup>4</sup> |
| LSY2548-1D  | <i>MATa-inc ura3::HOcs lys2::ura3-HOcs inc</i><br>(5.6 kb) <i>ade3::GAL-HO rad1::LEU2</i>                                    | This study   |
| LSY2548-11A | <i>MATa-inc ura3::HOcs lys2::ura3-HOcs inc</i><br>(5.6 kb) <i>ade3::GAL-HO rad1::LEU2</i><br><i>mus81::KanMX6</i>            | This study   |
| LSY2548-29C | <i>MATa-inc ura3::HOcs lys2::ura3-HOcs inc</i><br>(5.6 kb) <i>ade3::GAL-HO mus81::KanMX6</i><br><i>yen1::HIS3</i>            | This study   |
| LSY2548-39D | <i>MATa-inc ura3::HOcs lys2::ura3-HOcs inc</i><br>(5.6 kb) <i>ade3::GAL-HO mus81::KanMX6</i><br><i>rad1::LEU2 yen1::HIS3</i> | This study   |
| LSY2548-42A | <i>MATa-inc ura3::HOcs lys2::ura3-HOcs inc</i><br>(5.6 kb) <i>ade3::GAL-HO rad1::LEU2</i><br><i>yen1::HIS3</i>               | This study   |
| LSY2548-66B | <i>MATa-inc ura3::HOcs lys2::ura3-HOcs inc</i><br>(5.6 kb) <i>ade3::GAL-HO mus81::KanMX6</i>                                 | This study   |

\*All strains are of the W303 genotype (*his3-11, 15 leu2-3, 112 trp1-1 ade2-1 can1-100*), only mating type and differences from the standard genotype are listed.

## References

- 1 Bartsch, S., Kang, L. E. & Symington, L. S. RAD51 is required for the repair of plasmid double-stranded DNA gaps from either plasmid or chromosomal templates. *Mol Cell Biol* **20**, 1194-1205 (2000).
- 2 Ho, C. K., Mazon, G., Lam, A. F. & Symington, L. S. Mus81 and Yen1 promote reciprocal exchange during mitotic recombination to maintain genome integrity in budding yeast. *Mol Cell* **40**, 988-1000 (2010).
- 3 Aylon, Y., Liefshitz, B., Bitan-Banin, G. & Kupiec, M. Molecular dissection of mitotic recombination in the yeast *Saccharomyces cerevisiae*. *Mol Cell Biol* **23**, 1403-1417 (2003).

- 4 Agmon, N., Yovel, M., Harari, Y., Liefshitz, B. & Kupiec, M. The role of Holliday junction resolvases in the repair of spontaneous and induced DNA damage. *Nucleic Acids Res* **39**, 7009-7019 (2011).

**Supplementary Table 2a.** Number of crossover (CO), noncrossover (NCO) and break-induced replication (BIR) events in red/white sector colonies

|                        | CO  | NCO | BIR | Total |
|------------------------|-----|-----|-----|-------|
| WT                     | 290 | 939 | 15  | 1244  |
| <i>yen1</i>            | 114 | 324 | 4   | 442   |
| <i>mus81</i>           | 114 | 525 | 15  | 654   |
| <i>rad1</i>            | 270 | 870 | 26  | 1166  |
| <i>rad1 yen1</i>       | 74  | 243 | 7   | 324   |
| <i>mus81 rad1</i>      | 108 | 454 | 24  | 586   |
| <i>mus81 yen1</i>      | 6   | 166 | 22  | 194   |
| <i>mus81 rad1 yen1</i> | 0   | 92  | 20  | 112   |

**Supplementary Table 2b.** Fisher's exact test *P* values between relevant strains for CO events (gray area) or BIR events (white area) in red/white-sector colonies

|                        | WT     | <i>mus81</i> | <i>rad1</i> | <i>mus81 rad1</i> | <i>mus81 yen1</i> | <i>mus81 yen1 rad1</i> |
|------------------------|--------|--------------|-------------|-------------------|-------------------|------------------------|
| WT                     | --     | 0.003        | 0.96        | 0.018             | 0.0001            | 0.0001                 |
| <i>mus81</i>           | 0.19   | --           | 0.004       | 0.66              | 0.0001            | 0.0001                 |
| <i>rad1</i>            | 0.06   | 0.86         | --          | 0.023             | 0.0001            | 0.0001                 |
| <i>mus81 rad1</i>      | 0.0002 | 0.075        | 0.033       | --                | 0.0001            | 0.0001                 |
| <i>mus81 yen1</i>      | 0.0001 | 0.0001       | 0.0001      | 0.0006            | --                | 0.089                  |
| <i>mus81 yen1 rad1</i> | 0.0001 | 0.0001       | 0.0001      | 0.0001            | 0.1224            | --                     |

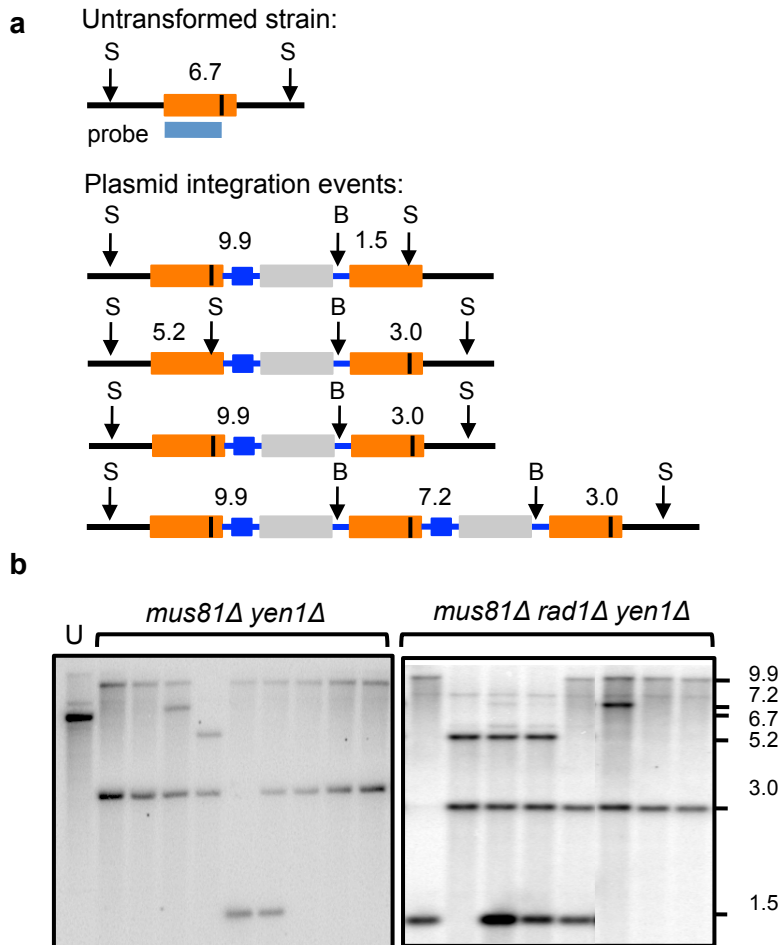

**Supplementary Figure 1. Homologous plasmid integration occurs in the absence of Mus81 and Yen1.** **a** Digestion of genomic DNA with SnaBI (S) and BamHI (B) distinguishes between the untransformed strain (U), random integration and homologous integration at the *MET17* locus. Conversion of the chromosomal *met17-s* allele gives rise to the distinct restriction fragments observed from independent transformants. **b** Representative transformants with a stable Ura<sup>+</sup> phenotype from the *mus81Δ yen1Δ* and *mus81Δ rad1Δ yen1Δ* mutants.

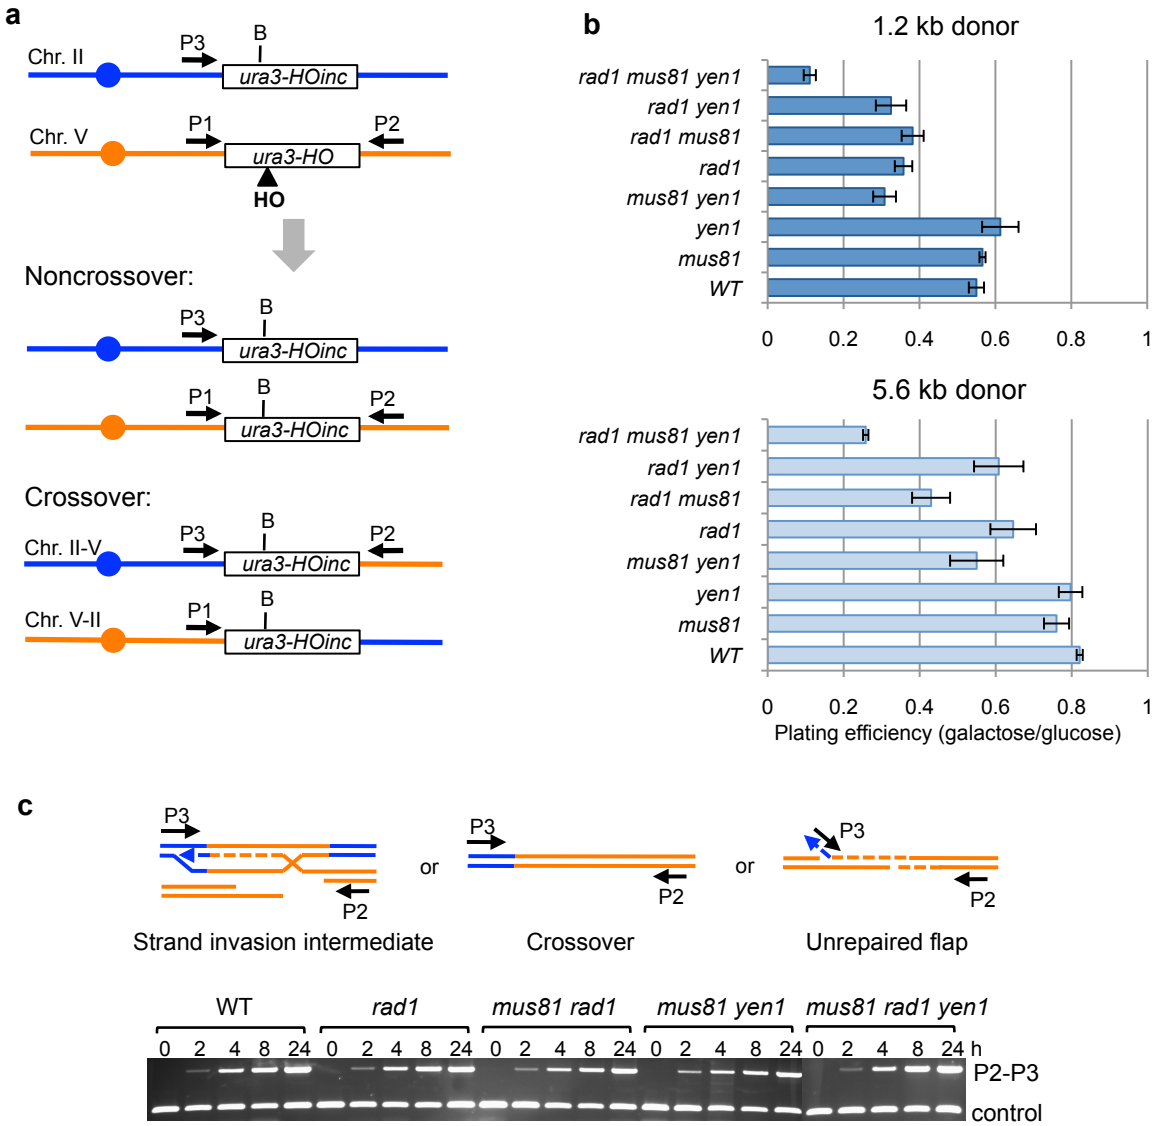

**Supplementary Figure 2. Rad1 is required for noncrossover repair between 1.2 kb ectopic repeats.** **a**, Schematic representation of the ectopic recombination assay; 1.2 or 5.6 kb sequences homologous to the *URA3* sequence and containing a mutant HO site (HOinc) are inserted at the *LYS2* locus on Chr. II. Primers P1, P2 and P3 are used to monitor cutting efficiency and repair of the 1.2 kb substrate by PCR. **b**, Repair efficiency was determined by the number of colony-forming units on galactose-containing medium compared with glucose-containing medium using at least three colonies for each strain. Errors bars show standard deviations and significance was determined by the *t* test. **c**, PCR using primers P2 and P3 detects strand invasion intermediates, crossover products and noncrossover products with an unrepaired heterologous flap.

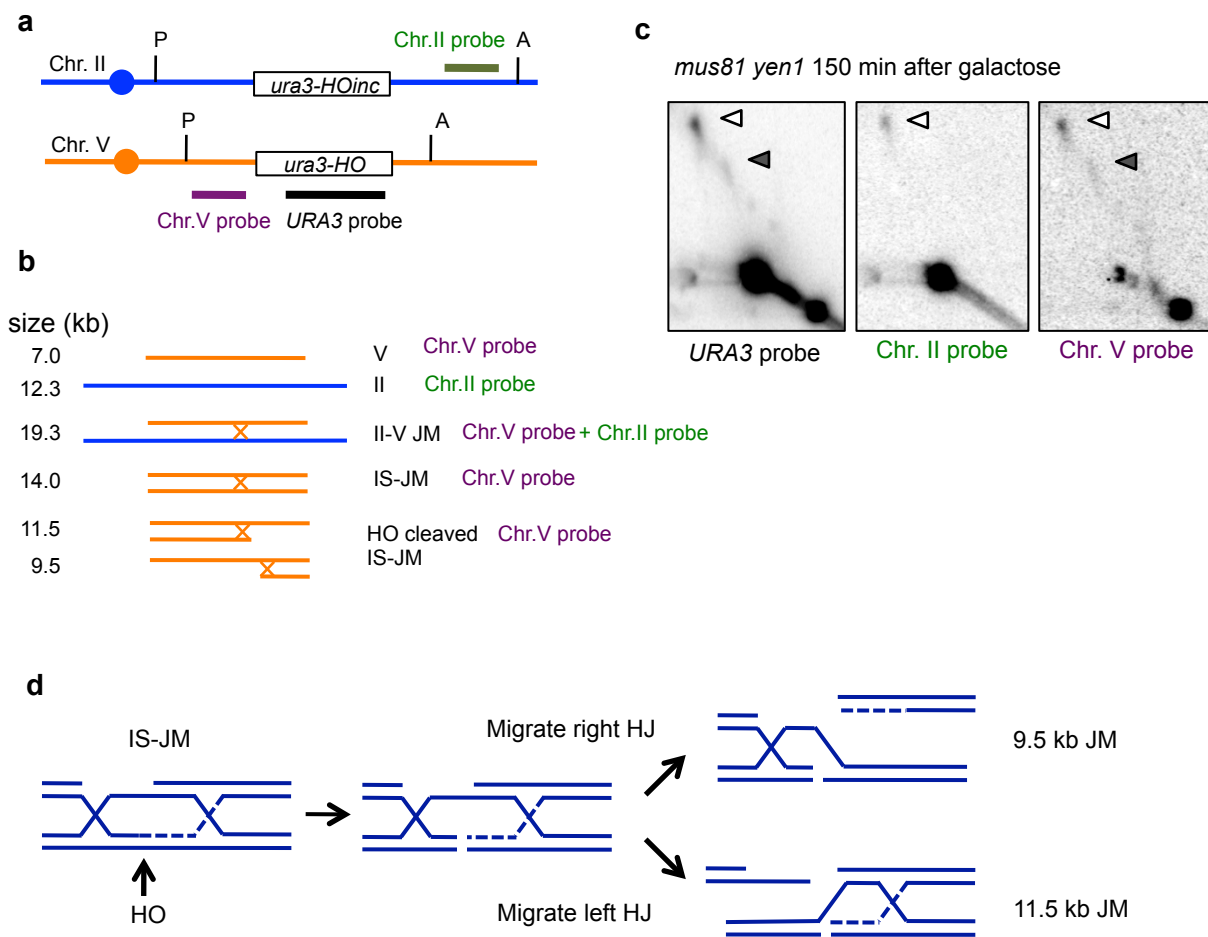

**Supplementary Figure 3. Identification of joint molecules using chromosome-specific probes.** **a**, Cartoon shown the locations of the *URA3* probe, Chr.II and Chr.V probes used for hybridization of the 2D gel membrane. **b**, Depiction of all classes of JMs detected and their expected hybridization to chromosome-specific probes. **c**, membrane from the *mus81 yen1* mutant, 150 min time point hybridized with each of the probes. **d**, Model to explain formation of 11.5 and 9.5 JM by HO cleavage of the IS-JM. An IS-JM forms by invasion of an uncut sister chromatid by the HO cut sister. If the IS-JM is not fully gap filled and ligated then the HO would cleave only the newly synthesized strand and its complement and not the D-loop. Branch migration of one of the two junctions towards the DSB would release the junction resulting in a Y-shaped molecule of the same size predicted for a single-end invasion intermediate.

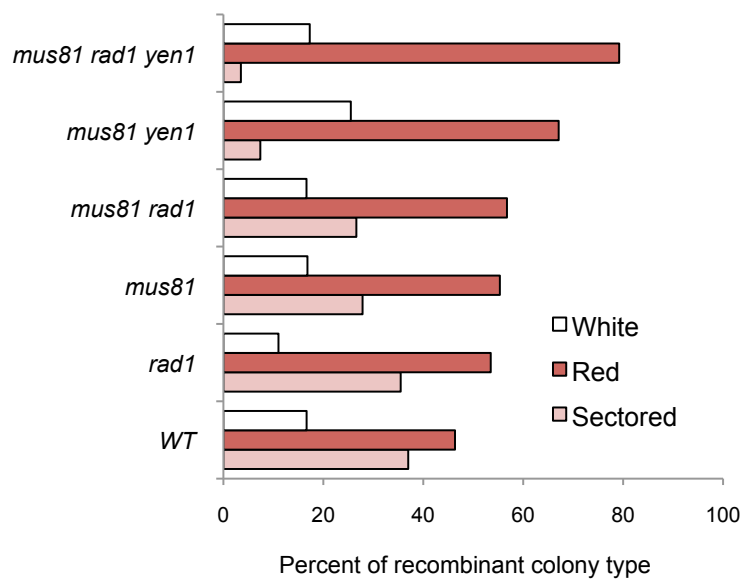

**Supplementary Figure 4. Percent of each recombinant colony type from the diploid recombination assay.** Colonies formed after 1-3 h I-SceI induction were scored as solid red, solid white or red/white sectored in each strain (>500 colonies were scored for each strain from at least three independent trials).



Rad1-Rad10 (XPF-ERRC1)

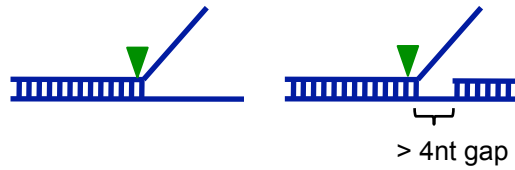

Mus81-Mms4 (MUS81-EME1)

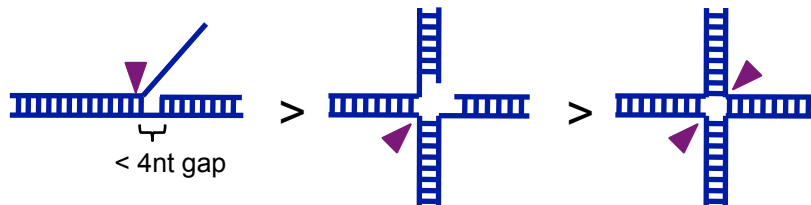

**Supplementary Figure 5. Preferred substrates for Rad1-Rad10 and Mus81-Mms4 cleavage.**

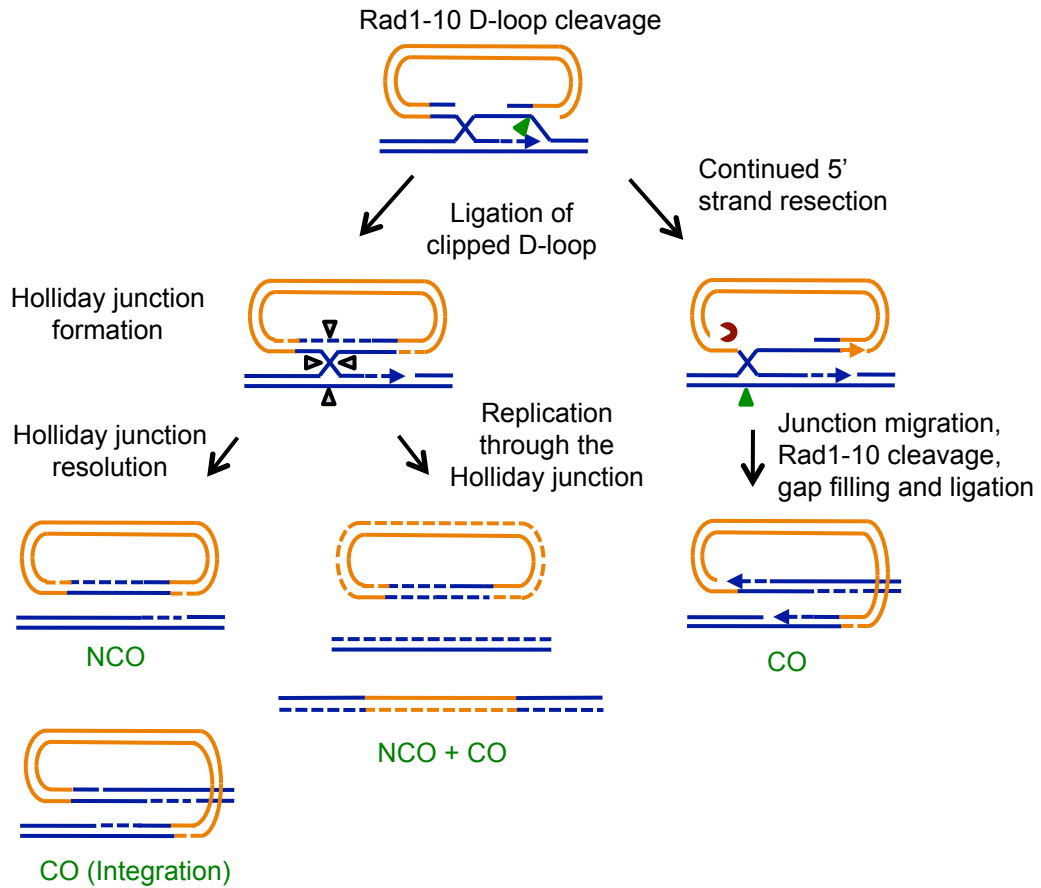

**Supplementary Figure 6. Model for plasmid integration by replication of a sHJ intermediate or Rad1 cleavage.** We suggest Rad1-Rad10 clips the D-loop after second end capture if there is a single-stranded DNA gap adjacent to the branch point. Following gap filling and ligation a sHJ intermediate is formed that can be resolved by endonucleolytic cleavage or by replication through the junction at the next S-phase. Alternatively, after the first Rad1-Rad10 cleavage and migration of the crossed stranded structure to the other heterology boundary, if resection continued beyond the branch point the structure could be cut by Rad1-Rad10.
